# Supplementary material for: Highly active half-sandwich chromium(iii) catalysts bearing bis(imino)pyrrole ligands for ethylene (co)polymerization
Source: Royal Society of Chemistry journal article supplement (doi:10.1039/c4ra02039a), 2014-01-01
Supplement: c4ra02039a1.pdf [file c4ra02039a1.pdf]

## Supporting Information

### Highly active half-sandwich chromium(III) catalysts bearing bis(imino)pyrrole ligands for ethylene (co)polymerization

Jing-Yu Liu, Ping Tao, Yong-Xia Wang, Yue-Sheng Li

State Key Laboratory of Polymer Physics and Chemistry, Changchun Institute of Applied Chemistry,  
Chinese Academy of Sciences, Changchun 130022, China

#### CONTENTS

**Figure S1.** Molecular structure of complex **2b** with thermal ellipsoids at 30% probability level. Hydrogen atoms are omitted for clarity.

**Figure S2.** Molecular structure of complex **2c** with thermal ellipsoids at 30% probability level. Hydrogen atoms are omitted for clarity.

**Fig. S3**  $^{13}\text{C}$  NMR spectra of E/NBE copolymer with different NBE incorporations produced by **2c** (a: 18.1%, entry 3; b: 38.8%, entry 7 in Table 3, respectively).

**Table S1.** Crystal data and structure refinements of complexes **3a-c**.

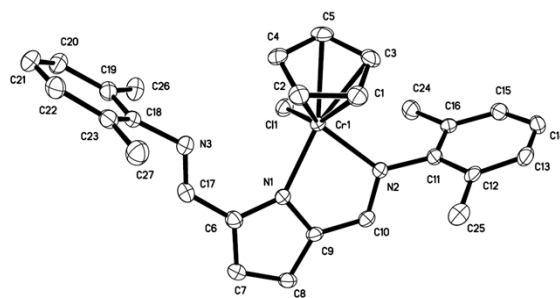

**Fig. S1** Molecular structure of complex **2b** with thermal ellipsoids at 30% probability level. Hydrogen atoms are omitted for clarity.

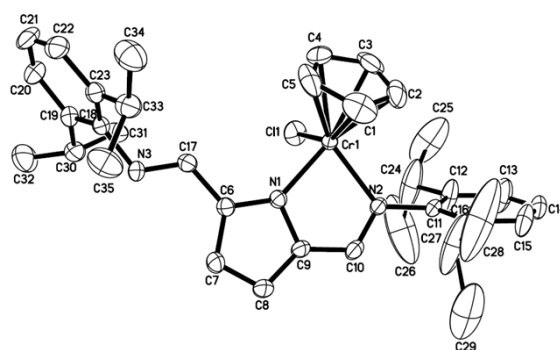

**Fig. S2** Molecular structure of complex **2c** with thermal ellipsoids at 30% probability level. Hydrogen atoms are omitted for clarity.

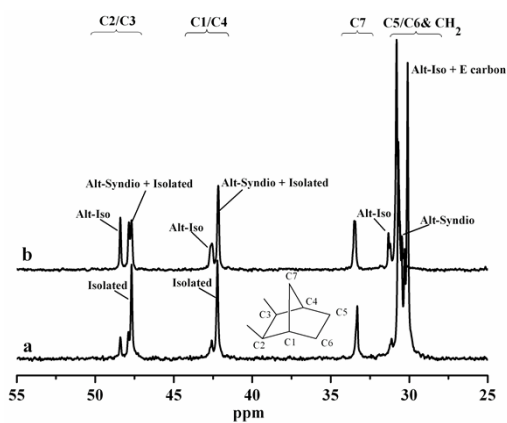

**Fig. S3**  $^{13}\text{C}$  NMR spectra of E/NBE copolymer with different NBE incorporations produced by **2c** (a: 18.1%, entry 3; b: 38.8%, entry 7 in Table 3, respectively).

**Table S1.** Crystal data and structure refinements of complexes **2a-c**.

|                                                      | <b>2a</b>                                          | <b>2b</b>                                          | <b>2c</b>                                          |
|------------------------------------------------------|----------------------------------------------------|----------------------------------------------------|----------------------------------------------------|
| Empirical formula                                    | C <sub>23</sub> H <sub>19</sub> ClCrN <sub>3</sub> | C <sub>27</sub> H <sub>27</sub> ClCrN <sub>3</sub> | C <sub>35</sub> H <sub>43</sub> ClCrN <sub>3</sub> |
| Formula weight                                       | 424.86                                             | 480.97                                             | 593.17                                             |
| Crystal system                                       | monoclinic                                         | monoclinic                                         | orthorhombic                                       |
| Space group                                          | P2(1)/c                                            | P2(1)/c                                            | Pbca                                               |
| a (Å)                                                | 17.7884(12)                                        | 11.4826(9)                                         | 18.7272(13)                                        |
| b (Å)                                                | 7.5640(5)                                          | 9.7676(8)                                          | 11.8149(8)                                         |
| c (Å)                                                | 14.5599(10)                                        | 24.3114(19)                                        | 29.400(2)                                          |
| α (°)                                                | 90.00                                              | 90.00                                              | 90.00                                              |
| β (°)                                                | 92.5180(10)                                        | 98.2830(10)                                        | 90.00                                              |
| γ (°)                                                | 90.00                                              | 90.00                                              | 90.00                                              |
| V (Å <sup>3</sup> ), Z                               | 1957.2(2), 4                                       | 2698.3(4), 4                                       | 6505.0(8), 8                                       |
| Density <sub>calcd</sub> (Mg/m <sup>3</sup> )        | 1.442                                              | 1.184                                              | 1.211                                              |
| Absorption coefficient (mm <sup>-1</sup> )           | 0.734                                              | 0.540                                              | 0.461                                              |
| F(000)                                               | 876                                                | 1004                                               | 2520                                               |
| Crystal size/mm                                      | 0.34×0.21×0.14                                     | 0.28× 0.21×0.13                                    | 0.32× 0.23×0.15                                    |
| θ range for data collection (°)                      | 2.29 to 26.01                                      | 1.69 to 26.03                                      | 1.76 to 25.04                                      |
| Reflections collected                                | 12033                                              | 16758                                              | 36643                                              |
| Independent reflections                              | 3846 ( <i>R</i> <sub>int</sub> = 0.0218)           | 5297 ( <i>R</i> <sub>int</sub> = 0.0509)           | 5747 ( <i>R</i> <sub>int</sub> = 0.1032)           |
| Data/restraints/ parameters                          | 3846/0/253                                         | 5297/0/289                                         | 5747/0/369                                         |
| Goodness-of-fit on F <sup>2</sup>                    | 1.036                                              | 1.043                                              | 1.018                                              |
| Final R indices [ <i>I</i> >2σ ( <i>I</i> ): R1, wR2 | 0.0363, 0.0940                                     | 0.0599, 0.1534                                     | 0.0742, 0.1683                                     |
| Largest diff. Peak and hole (e Å <sup>-3</sup> )     | 0.342 and -0.266                                   | 0.474 and -0.434                                   | 0.660 and -0.594                                   |
